# Supplementary material
Source: Springer Nature journal article supplement (https://www.springermedizin.de/resource/supplementary/12930_2013_54_MOESM1_ESM.pdf/9424650)
Supplement: MOESM1 [file 9424650]

**No. of oral/poster presentations and no. of Research Projects initiated by SHP investigators**

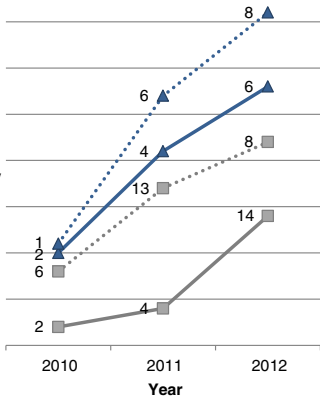

- ▲●● Number of Research Projects initiated by Non-RCC participants
- ▲— Number of Research Projects initiated by RCC participants
- Non-RCC participants who presented
- RCC participants who presented
